# Supplementary material for: The Wnt Receptor Ryk Reduces Neuronal and Cell Survival Capacity by Repressing FOXO Activity During the Early Phases of Mutant Huntingtin Pathogenicity
Source: PubMed Central journal article supplement (PMC4068980; doi:10.1371/journal.pbio.1001895), 2014-06-24
Supplement: pbio.1001895.s002.pdf [file pbio.1001895.s002.pdf]

| Stable modules | Process | Gene Ontology annotation                                 | Genes count / total                                                                | P-value                              |
|----------------|---------|----------------------------------------------------------|------------------------------------------------------------------------------------|--------------------------------------|
|                | 1       | Proteins of basement membrane                            | Proteinaceous extracellular matrix                                                 | 2/23<br>0.00050                      |
|                | 2       | Protease inhibitors                                      | Serine-type endopeptidase inhibitor activity<br>Proteinaceous extracellular matrix | 2/20<br>2/23<br>0.00066<br>0.00028   |
|                | 3       | Sphingomyelinases                                        | Sphingolipid catabolic process                                                     | 2/2<br>2.6e-07                       |
|                | 4       | Channel complex subunits, lectins, innexins              | N/A                                                                                | N/A<br>N/A                           |
|                | 5       | Acetylcholine receptor and extracellular matrix          | Nicotinic acetylcholine-activated cation-selective channel activity                | 2/11<br>0.0004                       |
|                | 6       | Transporters, ABC superfamily                            | N/A                                                                                | N/A<br>N/A                           |
|                | 7       | Kinesin-like proteins                                    | Cytoskeleton-dependent intracellular transport                                     | 2/34<br>0.00031                      |
|                | 8       | Cytoskeleton and Calcium binding proteins                | N/A                                                                                | N/A<br>N/A                           |
|                | 9       | Enzymes of mitochondrial translation                     | N/A                                                                                | N/A<br>N/A                           |
|                | 10      | Electron transfer flavoprotein ubiquinone oxidoreductase | N/A                                                                                | N/A<br>N/A                           |
|                | 11      | Mitochondrial/chloroplast ribosomal proteins S18         | Ribonucleoprotein complex structural Constituent of ribosome                       | 3/153<br>3/116<br>0.00021<br>1.5e-05 |
|                | 12      | Mitochondrial import inner membrane translocases         | N/A                                                                                | N/A<br>N/A                           |
|                | 13      | Enzymes, mitochondrial                                   | N/A                                                                                | N/A<br>N/A                           |

|                                                                                               |                                                     |                                                                                       |                       |                               |
|-----------------------------------------------------------------------------------------------|-----------------------------------------------------|---------------------------------------------------------------------------------------|-----------------------|-------------------------------|
| 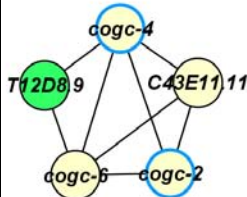 <p>14</p>   | Golgi proteins                                      | N/A                                                                                   | N/A                   | N/A                           |
|  <p>15</p>   | Centromere protein, chromosome segregation          | N/A                                                                                   | N/A                   | N/A                           |
|  <p>16</p>   | Predicted RNA-binding protein                       | N/A                                                                                   | N/A                   | N/A                           |
|  <p>17</p>   | T-box transcription factors                         | N/A                                                                                   | N/A                   | N/A                           |
|  <p>18</p>   | Proteins of cell cycle                              | N/A                                                                                   | N/A                   | N/A                           |
|  <p>19</p>   | DNA polymerases                                     | DNA repair response to DNA<br>Damage stimulus Response to stress                      | 3/75<br>3/84<br>3/140 | 0.00020<br>0.00020<br>0.00069 |
|  <p>20</p>   | Y18D10A.9, WD40 repeat protein                      | N/A                                                                                   | N/A                   | N/A                           |
|  <p>21</p>  | Enzymes of carbohydrate metabolism                  | Energy derivation by oxidation of organic compounds                                   | 5/24                  | 5.3e-09                       |
|  <p>22</p> | Enzymes of glucose metabolism and energy metabolism | Monocarboxylic acid metabolic process<br>Ligase activity, forming carbon-carbon bonds | 5/48<br>2/2           | 2.3e-05<br>0.00068            |
|  <p>23</p> | Enzymes of galactose metabolism                     | Galactose metabolic process                                                           | 2/3                   | 0.00036                       |

|                                                                                     |    |                                                                |                                                                     |                     |                               |
|-------------------------------------------------------------------------------------|----|----------------------------------------------------------------|---------------------------------------------------------------------|---------------------|-------------------------------|
| 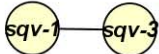   | 24 | Proteins of carbohydrate metabolism                            | N/A                                                                 | N/A                 | N/A                           |
|    | 25 | Enzymes of lipid metabolism                                    | N/A                                                                 | N/A                 | N/A                           |
|    | 26 | Enzymes of lipid metabolism                                    | N/A                                                                 | N/A                 | N/A                           |
|    | 27 | Fatty acid-binding proteins                                    | Lipid binding                                                       | 3/44                | 7.9e-07                       |
|    | 28 | Enzymes of metabolism                                          | N/A                                                                 | N/A                 | N/A                           |
|    | 29 | Translation initiation factors and related proteins            | N/A                                                                 | N/A                 | N/A                           |
|    | 30 | Hydrolases                                                     | N/A                                                                 | N/A                 | N/A                           |
|   | 31 | Transaminases                                                  | Transaminase activity                                               | 2/21                | 0.00044                       |
|  | 32 | Glutamine synthetase, glutamate dehydrogenase                  | N/A                                                                 | N/A                 | N/A                           |
|  | 33 | Metalloprotease and Transcription accessory protein            | N/A                                                                 | N/A                 | N/A                           |
|  | 34 | Beta-galactosidases and serine carboxy peptidases              | Beta-galactosidase activity<br>Serine carboxy-peptidase activity    | 2/2<br>2/6          | 3.6e-06<br>3.6e-05            |
|  | 35 | rla-2, acidic ribosomal subunit protein P2                     | N/A                                                                 | N/A                 | N/A                           |
|  | 36 | ATP-dependent RNA helicases and focal adhesion adaptor protein | JUN kinase binding<br>ATP-dependent Helicase activity<br>Pole plasm | 3/4<br>3/62<br>3/21 | 9.6e-09<br>3.3e-05<br>3.6e-06 |
|  | 37 | Chaperones, cytoskeletal and mitochondrial proteins            | Ubiquitin protein ligase binding                                    | 2/3                 | 9.2e-05                       |
|  | 38 | Heat shock proteins                                            | N/A                                                                 | N/A                 | N/A                           |
|  | 39 | Chaperones                                                     | N/A                                                                 | N/A                 | N/A                           |

|           |                                                                         |                                                                                              |                          |                               |
|-----------|-------------------------------------------------------------------------|----------------------------------------------------------------------------------------------|--------------------------|-------------------------------|
| <p>40</p> | <p>Wnt signaling pathway, transcription factors and axonal guidance</p> | <p>Microtubule cytoskeleton organization and biogenesis</p> <p>Microtubule-based process</p> | <p>4/80</p> <p>4/106</p> | <p>0.00047</p> <p>0.00096</p> |
|-----------|-------------------------------------------------------------------------|----------------------------------------------------------------------------------------------|--------------------------|-------------------------------|
