# Supplementary material for: The Wnt Receptor Ryk Reduces Neuronal and Cell Survival Capacity by Repressing FOXO Activity During the Early Phases of Mutant Huntingtin Pathogenicity
Source: PubMed Central journal article supplement (PMC4068980; doi:10.1371/journal.pbio.1001895), 2014-06-24
Supplement: pbio.1001895.s011.pdf [file pbio.1001895.s011.pdf]

|            |         |             |            |           |           |                                      |        |
|------------|---------|-------------|------------|-----------|-----------|--------------------------------------|--------|
| T10C6.9    |         | -2.53988130 | 0.00268828 | -         |           |                                      |        |
| C53D5.3    |         | -2.48388130 | 0.00060121 | -         |           |                                      |        |
| F49F1.12   |         | -2.47688130 | 0.00152717 | -         |           |                                      |        |
| M01B2.7    | srsx-37 | -2.46388130 | 0.00047765 | -         |           |                                      |        |
| Y116F11B.8 |         | -2.30688130 | 0.00036227 | -         |           |                                      |        |
| F15G9.2    |         | -2.11388130 | 0.00984344 | -         |           |                                      |        |
| R151.4     |         | -1.79588130 | 0.00689312 | -         |           |                                      |        |
|            |         |             |            |           |           | olfactory<br>receptor,<br>family 13, |        |
| T10H9.6    | str-180 | -1.71088130 | 0.00239801 | ENSP00000 | ENSG00000 | subfamily G,<br>member 1             | OR13G1 |
|            |         |             |            | 352717    | 0197437   | olfactory<br>receptor,<br>family 13, |        |
|            |         |             |            |           |           | subfamily G,                         |        |
| M7.13      | str-3   | -1.68688130 | 0.00060121 | ENSP00000 | ENSG00000 | member 1                             | OR13G1 |
| T22B3.1    | dpy-20  | 2.652118692 | 2.06E-07   | -         |           |                                      |        |
| T08A9.9    | spp-5   | 2.847118692 | 0.00886884 | -         |           |                                      |        |
| W08F4.9    | fbxb-14 | 3.012118692 | 0.00060121 | -         |           |                                      |        |
| Y39B6A.20  | asp-1   | 3.108118692 | 0.00388489 | -         |           |                                      |        |
| F21F8.7    | asp-6   | 3.387118692 | 0.00348052 | -         |           |                                      |        |
| ZK792.7    |         | 3.533118692 | 3.19E-06   | -         |           |                                      |        |
| Y47H10A.5  |         | 4.216118692 | 0.00033837 | -         |           |                                      |        |
